# Supplementary material
Source: PubMed Central journal article supplement (PMC4349067)
Supplement: dafb506f95253ccb4a540e32443013d2_genetics.114.173765-2.pdf [file dafb506f95253ccb4a540e32443013d2_genetics.114.173765-2.pdf]

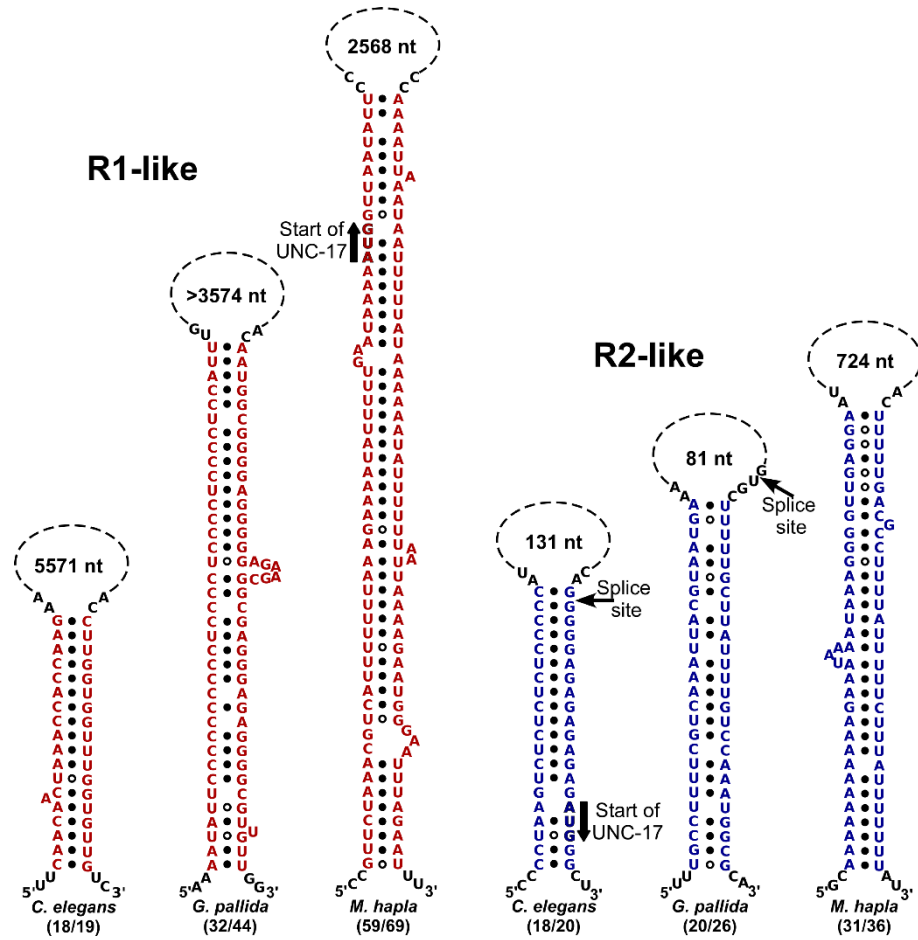

**Figure S4** Putative stem-loop alignments of the R1-like and R2-like sequences from the cholinergic loci of *Globodera pallida* and *Meloidogyne hapla* (see Figure S3). The corresponding *C. elegans* alignments are shown for comparison. Splice sites and UNC-17 initiation codons are indicated (when present). The exact size of the *G. pallida* R1-like loop is uncertain because of a gap in the genomic sequence.
