# Supplementary material
Source: PubMed Central journal article supplement (PMC4349067)
Supplement: e53fe311ed0e62a60d4dcd74a474bbd7_genetics.114.173765-3.pdf [file e53fe311ed0e62a60d4dcd74a474bbd7_genetics.114.173765-3.pdf]

**Table S1 Properties and evaluation of *C. elegans* R1 and R2 sequences**

**(A) Scrambled R1 and R2 sequences**

| Element       | WT sequence         | Scrambled sequence          |
|---------------|---------------------|-----------------------------|
| R1 upstream   | CAACAACATAACCACCAAG | ACACACACCACAAGCCATA (p2524) |
| R1 downstream | CTTGGTGGTTTGGTGTG   | TATGGCTTGTGGTGTGTGT (p2525) |
| R2 upstream   | TCTCTCTCTCCCC       | CTCCTCCTCCTCC (p2527)       |
| R2 downstream | GGGGGAGAGAGAGA      | GGAGGAAGGAGGAG (p2526)      |

**(B) Genes with coordinated exon skipping**

| Transcript*             | # of exons skipped | Complementary sequence elements? |
|-------------------------|--------------------|----------------------------------|
| <i>cha-1</i>            | 3                  | Yes                              |
| <i>unc-49B</i>          | 8                  | No                               |
| <i>unc-49C</i>          | 16                 | No                               |
| <i>unc-60B</i>          | 4                  | No                               |
| <i>avr-14B (gbr-2B)</i> | 7                  | No                               |

\*Transcript terminology and structure for *cha-1* from Alfonso *et al.* 1994; *unc-49* from Bamber *et al.* 1999; for *unc-60* from McKim *et al.* 1994; for *avr-14* (aka *gbr-2*) from Laughton *et al.* 1997 and Dent *et al.* 2000. Genomic sequences for all genes were downloaded from WormBase, Release WS240 ([www.wormbase.org](http://www.wormbase.org)).

**(C) Long introns evaluated for complementary sequence elements**

| Gene/transcript*        | Intron examined        | Intron size | Complementary sequence elements? |
|-------------------------|------------------------|-------------|----------------------------------|
| <i>cha-1</i>            | From exon 1 to exon c2 | 6.9 kb      | Yes                              |
| <i>ric-4A(snap-25A)</i> | From exon 1A to exon 2 | 7.8 kb      | No                               |
| <i>gar-3B</i>           | From exon 2 to exon 3  | 9.0 kb      | No                               |
| <i>gcy-28D</i>          | From exon 5 to exon 6  | 13.6 kb     | No                               |

\*Transcript terminology and structure for *cha-1* from Alfonso *et al.* 1994; for *ric-4* (aka *snap-25*), *gar-3*, and *gcy-2* from WormBase. Genomic sequences for all genes were downloaded from WormBase, Release WS240 ([www.wormbase.org](http://www.wormbase.org)).

**LITERATURE CITED**

- Alfonso, A., K. Grundahl, J. R. McManus, J. M. Asbury and J. B. Rand, 1994 Alternative splicing leads to two cholinergic proteins in *Caenorhabditis elegans*. *J. Mol. Biol.* 241: 627-630.
- Bamber, B. A., A. A. Beg, R. E. Twyman, and E. M. Jorgensen, 1999 The *Caenorhabditis elegans unc-49* locus encodes multiple subunits of a heteromultimeric GABA receptor. *J. Neurosci.* 19: 5348–5359.
- Dent, J. A., M. M. Smith, D. K. Vassilatis, and L. Avery, 2000 The genetics of ivermectin resistance in *Caenorhabditis elegans*. *Proc. Natl. Acad. Sci. USA* 97: 2674–2679.
- Laughton, D. L., G. G. Lunt, and A. J. Wolstenholme, 1997 Alternative splicing of a *Caenorhabditis elegans* gene produces two novel inhibitory amino acid receptor subunits with identical ligand binding domains but different ion channels. *Gene* 201: 119–125.
- McKim, K. S., C. Matheson, M. A. Marra, M. F. Wakarchuk, and D. L. Baillie, 1994 The *Caenorhabditis elegans unc-60* gene encodes proteins homologous to a family of actin-binding proteins. *Mol. Gen. Genet.* 242: 346–357.
